# Supplementary material
Source: PubMed Central journal article supplement (PMC4290967)
Supplement: JCM.02026-14_zjm999093970so2.pdf [file JCM.02026-14_zjm999093970so2.pdf]

**Supplementary Table 1A.****Full genomic information of all genomes included the study.**

| <b>Isolate no.</b> | <b>Read length (bp)</b> |
|--------------------|-------------------------|
| 1                  | 95                      |
| 5                  | 35-251                  |
| 6                  | 35-251                  |
| 7                  | 95                      |
| 8                  | 35-251                  |
| 9                  | 95                      |
| 12                 | 95                      |
| 13                 | 95                      |
| 14                 | 95                      |
| 15                 | 95                      |
| 31                 | 31-100                  |
| 34                 | 35-100                  |
| 35                 | 45-100                  |
| 36                 | 35-251                  |
| 42                 | 29-100                  |
| 46                 | 49-100                  |
| 49                 | 35-251                  |
| 53                 | 55-100                  |
| 54                 | 35-251                  |
| 70                 | 55-100                  |
| 71                 | 43-100                  |
| 1012               | 35-251                  |
| 12                 | 35-251                  |
| 1341               | 35-251                  |
| 225                | 35-251                  |
| 269                | 35-251                  |
| 279                | 35-251                  |
| 361                | 35-251                  |
| 674                | 35-251                  |
| 739                | 35-251                  |
| 748                | 35-251                  |
| 911                | 35-251                  |

**Public genomes**

| <b>Isolate ID</b> | <b>Country</b> |
|-------------------|----------------|
| CT18              | Vietnam        |
| AG3               | Vietnam        |
| E02-2759          | India          |
| ISP-04-06979      | Central Africa |
| E03-9804          | Nepal          |
| ISP-03-07467      | Morocco        |

| <b>Total Reads (no)</b> | <b>Average read depth</b> | <b>Insert size</b> | <b>GC content (%)</b> |
|-------------------------|---------------------------|--------------------|-----------------------|
| 10465710                | 117.2                     | -                  | 51                    |
| 502445                  | 32.5                      | 158                | 51                    |
| 1211293                 | 11.4                      | 169                | 51                    |
| 5720046                 | 78.8                      | -                  | 51                    |
| 1161340                 | 14.6                      | 177                | 51                    |
| 11664325                | 122.5                     | -                  | 51                    |
| 6091141                 | 81.6                      | -                  | 51                    |
| 5118271                 | 71.5                      | -                  | 51                    |
| 7236224                 | 90.5                      | -                  | 51                    |
| 6006275                 | 82.2                      | -                  | 51                    |
| 3046914                 | 115.4                     | 374                | 51                    |
| 3351745                 | 129.0                     | 402                | 51                    |
| 2580654                 | 97.5                      | 403                | 51                    |
| 1349664                 | 12.8                      | 189                | 51                    |
| 2582796                 | 99.1                      | 433                | 51                    |
| 1484940                 | 56.6                      | 427                | 51                    |
| 972455                  | 11.5                      | 187                | 51                    |
| 1762789                 | 67.2                      | 452                | 51                    |
| 1263152                 | 10.9                      | 158                | 51                    |
| 1492338                 | 56.7                      | 497                | 51                    |
| 1884095                 | 72.0                      | 456                | 51                    |
| 1233724                 | 62.5                      | 162                | 51                    |
| 993271                  | 56.7                      | 155                | 51                    |
| 1392883                 | 63.9                      | 159                | 51                    |
| 1152319                 | 61.9                      | 166                | 51                    |
| 1088375                 | 60.7                      | 153                | 51                    |
| 1022280                 | 60.8                      | 181                | 51                    |
| 881620                  | 53.0                      | 198                | 51                    |
| 1327234                 | 87.6                      | 264                | 51                    |
| 1241995                 | 75.6                      | 214                | 51                    |
| 1394046                 | 84.3                      | 192                | 51                    |
| 1376523                 | 66.5                      | 147                | 51                    |

| <b>Year</b> | <b>Haplotype</b> | <b>Genbank ID</b> | <b>Source</b> |
|-------------|------------------|-------------------|---------------|
| 1993        | H1               | AL513382          | NCBI          |
| 2004        | H58              | CAAY00000000      | NCBI          |
| 2002        | H58              | -                 | Sanger        |
| 2004        | H58              | -                 | Sanger        |
| 2003        | H58              | -                 | Sanger        |
| 2003        | H58              | -                 | Sanger        |

| Sequencing platform | N50 (bp) | Total contigs | Total length of sequence (bp) |
|---------------------|----------|---------------|-------------------------------|
| Illumina (BGI)      | 25180    | 374           | 4744214                       |
| Illumina MiSeq      | 59520    | 177           | 4729455                       |
| Illumina MiSeq      | 143433   | 88            | 4780503                       |
| Illumina (BGI)      | 24726    | 377           | 4744419                       |
| Illumina MiSeq      | 153429   | 85            | 4685827                       |
| Illumina (BGI)      | 25179    | 385           | 4745648                       |
| Illumina (BGI)      | 24206    | 390           | 4745025                       |
| Illumina (BGI)      | 23938    | 389           | 4746965                       |
| Illumina (BGI)      | 23676    | 404           | 4783218                       |
| Illumina (BGI)      | 24765    | 391           | 4742136                       |
| Illumina HiSeq      | 206184   | 78            | 4750645                       |
| Illumina HiSeq      | 204269   | 75            | 4750804                       |
| Illumina HiSeq      | 186675   | 84            | 4792846                       |
| Illumina MiSeq      | 144286   | 88            | 4732620                       |
| Illumina HiSeq      | 204269   | 74            | 4751179                       |
| Illumina HiSeq      | 221745   | 78            | 4751180                       |
| Illumina MiSeq      | 143479   | 80            | 4737442                       |
| Illumina HiSeq      | 206193   | 74            | 4752104                       |
| Illumina MiSeq      | 154782   | 84            | 4741519                       |
| Illumina HiSeq      | 206120   | 68            | 4755515                       |
| Illumina HiSeq      | 204269   | 78            | 4750221                       |
| Illumina MiSeq      | 28409    | 480           | 4699244                       |
| Illumina MiSeq      | 2694182  | 58            | 4713610                       |
| Illumina MiSeq      | 28980    | 363           | 4742770                       |
| Illumina MiSeq      | 35231    | 309           | 4718813                       |
| Illumina MiSeq      | 4612297  | 73            | 4746801                       |
| Illumina MiSeq      | 32411    | 317           | 4710498                       |
| Illumina MiSeq      | 30284    | 359           | 4703371                       |
| Illumina MiSeq      | 42197    | 224           | 4716255                       |
| Illumina MiSeq      | 4671909  | 46            | 4785946                       |
| Illumina MiSeq      | 42747    | 264           | 4715900                       |
| Illumina MiSeq      | 3821004  | 351           | 4681861                       |

| Total contigs | Total length of sequence (bp) | Download link                                                                                                                   |
|---------------|-------------------------------|---------------------------------------------------------------------------------------------------------------------------------|
| 1             | 4809037                       | -                                                                                                                               |
| 7336          | 4751206                       | -                                                                                                                               |
| 1             | 4809037                       | <a href="ftp://ftp.sanger.ac.uk/pub/pathogens/Salmonella/typhi/so">ftp://ftp.sanger.ac.uk/pub/pathogens/Salmonella/typhi/so</a> |

| <b>Accession</b> |
|------------------|
| ERS540069        |
| ERS540030        |
| ERS540031        |
| ERS540070        |
| ERS540033        |
| ERS540071        |
| ERS540072        |
| ERS540073        |
| ERS540074        |
| ERS540075        |
| ERS540039        |
| ERS540040        |
| ERS540041        |
| ERS540042        |
| ERS540043        |
| ERS540044        |
| ERS540045        |
| ERS540046        |
| ERS540047        |
| ERS540048        |
| ERS540049        |
| ERS540050        |
| ERS540051        |
| ERS540052        |
| ERS540053        |
| ERS540054        |
| ERS540055        |
| ERS540056        |
| ERS540057        |
| ERS540058        |
| ERS540059        |
| ERS540060        |

lexa/E02-2759\_solexa\_genome.fastq  
lexa/ISP-04-06979\_solexa\_genome.fastq  
lexa/E03-9804\_solexa\_genome.fastq  
lexa/ISP-03-07467\_solexa\_genome.fastq

**Supplementary Table 1B****SNP positions of the 33 WGST isolates.**

| pos    | ref | alt | ref_codon | alt_codon | aa_change |
|--------|-----|-----|-----------|-----------|-----------|
| 12478  | C   | T   | CAC       | CAT       | His       |
| 17187  | G   | A   | GTG       | GTA       | Val       |
| 22623  | T   | C   | TTG       | CTG       | Leu       |
| 32762  | G   | A   | CTG       | CTA       | Leu       |
| 35122  | T   | C   | -         | -         | -         |
| 40159  | G   | A   | GGG       | GAG       | Gly11Glu  |
| 61892  | T   | C   | TAC       | CAC       | Tyr520His |
| 63831  | C   | T   | ACG       | ATG       | Thr339Met |
| 76422  | A   | G   | AGC       | GGC       | Ser243Gly |
| 80983  | T   | C   | TAC       | CAC       | Tyr150His |
| 89102  | A   | G   | AAA       | AGA       | Lys201Arg |
| 93158  | A   | G   | TAG       | TGG       | *388Trp   |
| 115909 | C   | T   | -         | -         | -         |
| 117735 | T   | C   | -         | -         | -         |
| 124045 | C   | T   | ATC       | ATT       | Ile       |
| 136763 | T   | C   | TGC       | CGC       | Cys261Arg |
| 158891 | G   | T   | GCG       | GCT       | Ala       |
| 160293 | T   | C   | TTG       | CTG       | Leu       |
| 163958 | G   | A   | CTG       | CTA       | Leu       |
| 175120 | C   | T   | CCT       | CTT       | Pro415Leu |
| 202039 | C   | T   | CTG       | TTG       | Leu       |
| 204478 | C   | T   | CCG       | CTG       | Pro37Leu  |
| 214999 | A   | G   | ACC       | GCC       | Thr286Ala |
| 219989 | C   | T   | GCA       | GTA       | Ala265Val |
| 260848 | T   | C   | TTG       | CTG       | Leu       |
| 313260 | G   | A   | GCG       | GCA       | Ala       |
| 316812 | C   | G   | ACT       | AGT       | Thr147Ser |
| 354895 | G   | A   | GTG       | ATG       | Val563Met |
| 362463 | A   | T   | CAC       | CTC       | His642Leu |
| 381217 | A   | G   | AAT       | AGT       | Asn748Ser |
| 381514 | G   | A   | CGG       | CAG       | Arg649Gln |
| 387082 | G   | A   | CGA       | CAA       | Arg33Gln  |
| 387595 | C   | T   | ACC       | ATC       | Thr204Ile |
| 397389 | A   | G   | AAC       | GAC       | Asn171Asp |
| 399478 | T   | C   | CTT       | CTC       | Leu       |
| 401918 | T   | C   | ACT       | ACC       | Thr       |
| 408989 | G   | A   | CTG       | CTA       | Leu       |
| 413125 | T   | C   | CTG       | CCG       | Leu452Pro |
| 426870 | A   | G   | AGG       | GGG       | Arg205Gly |
| 429115 | T   | C   | -         | -         | -         |
| 435831 | C   | T   | GCG       | GTG       | Ala122Val |
| 445543 | A   | G   | GCA       | GCG       | Ala       |
| 448607 | G   | A   | GGG       | GGA       | Gly       |

|        |   |   |     |     |           |
|--------|---|---|-----|-----|-----------|
| 448862 | A | G | CTA | CTG | Leu       |
| 461438 | C | T | CGT | TGT | Arg4Cys   |
| 461883 | A | T | -   | -   | -         |
| 479552 | G | A | GCT | ACT | Ala117Thr |
| 484623 | A | G | GAA | GAG | Glu       |
| 490361 | A | G | -   | -   | -         |
| 510606 | T | C | CCT | CCC | Pro       |
| 529155 | A | G | AAA | GAA | Lys590Glu |
| 542934 | T | C | ACT | ACC | Thr       |
| 549399 | G | A | CTG | CTA | Leu       |
| 552803 | A | G | ATG | GTG | Met290Val |
| 574463 | T | C | GGT | GGC | Gly       |
| 593977 | G | A | GTG | GTA | Val       |
| 596844 | T | C | TAG | CAG | *47Gln    |
| 601409 | A | G | AAA | AAG | Lys       |
| 610111 | G | A | GAG | GAA | Glu       |
| 612535 | C | T | CTG | TTG | Leu       |
| 615940 | C | T | GGC | GGT | Gly       |
| 621496 | G | A | GAA | AAA | Glu102Lys |
| 650335 | C | T | GCC | GCT | Ala       |
| 651393 | T | C | ACT | ACC | Thr       |
| 651929 | A | C | ACC | CCC | Thr23Pro  |
| 656747 | G | A | GAG | GAA | Glu       |
| 661114 | T | C | GGT | GGC | Gly       |
| 667579 | T | C | TAC | CAC | Tyr199His |
| 670885 | C | G | CAC | GAC | His53Asp  |
| 679680 | G | T | TGT | TTT | Cys304Phe |
| 690176 | T | G | GTC | GGC | Val85Gly  |
| 693560 | G | A | ATG | ATA | Met100Ile |
| 704744 | C | T | GTC | GTT | Val       |
| 736002 | C | A | CCC | ACC | Pro87Thr  |
| 738393 | G | A | GTG | ATG | Val326Met |
| 743950 | G | T | TGT | TTT | Cys543Phe |
| 751854 | C | T | TGC | TGT | Cys       |
| 754490 | T | C | CTC | CCC | Leu48Pro  |
| 775503 | A | G | CTA | CTG | Leu       |
| 788874 | G | A | CAG | CAA | Gln       |
| 789347 | G | A | -   | -   | -         |
| 817881 | A | G | AAA | AAG | Lys       |
| 845672 | T | G | GCT | GCG | Ala       |
| 869699 | T | C | TTG | CTG | Leu       |
| 874298 | G | A | GAG | GAA | Glu       |
| 879431 | T | A | -   | -   | -         |
| 880083 | A | G | ACC | GCC | Thr201Ala |
| 902056 | C | T | ACC | ACT | Thr       |
| 909985 | A | G | ATA | ATG | Ile340Met |

|         |   |   |     |     |           |
|---------|---|---|-----|-----|-----------|
| 911156  | T | C | TTT | TTC | Phe       |
| 936286  | C | T | GGC | GGT | Gly       |
| 955573  | C | T | TAC | TAT | Tyr       |
| 1055966 | C | T | -   | -   | -         |
| 1090397 | A | G | -   | -   | -         |
| 1092870 | C | T | CAC | TAC | His411Tyr |
| 1095905 | T | C | GTC | GCC | Val87Ala  |
| 1098125 | C | T | -   | -   | -         |
| 1113205 | C | T | CTC | TTC | Leu19Phe  |
| 1136685 | C | T | CAT | TAT | His108Tyr |
| 1171121 | A | G | ACT | GCT | Thr347Ala |
| 1181520 | G | A | CTG | CTA | Leu       |
| 1193220 | T | C | GGT | GGC | Gly       |
| 1217400 | T | C | GGT | GGC | Gly       |
| 1223740 | A | G | CAC | CGC | His280Arg |
| 1241351 | C | A | ATC | ATA | Ile       |
| 1241623 | G | A | GGG | AGG | Gly113Arg |
| 1245025 | G | T | ATG | ATT | Met314Ile |
| 1254424 | T | C | ACT | ACC | Thr       |
| 1264214 | G | A | -   | -   | -         |
| 1269646 | G | A | GAT | AAT | Asp189Asn |
| 1270888 | G | A | CGA | CAA | Arg252Gln |
| 1286044 | A | G | GAC | GGC | Asp372Gly |
| 1289728 | T | C | TTC | CTC | Phe234Leu |
| 1302907 | G | A | GTC | ATC | Val67Ile  |
| 1307379 | C | T | GCT | GTT | Ala597Val |
| 1339645 | A | G | -   | -   | -         |
| 1348205 | T | C | ATG | ACG | Met293Thr |
| 1350330 | G | T | AGC | ATC | Ser10Ile  |
| 1360939 | C | T | CAG | TAG | Gln30*    |
| 1363837 | T | C | -   | -   | -         |
| 1369705 | G | A | GCG | ACG | Ala613Thr |
| 1399284 | T | C | GTG | GCG | Val164Ala |
| 1408039 | C | T | CAG | TAG | Gln185*   |
| 1431936 | C | T | CTG | TTG | Leu       |
| 1437437 | A | G | CCA | CCG | Pro       |
| 1444653 | G | A | GGT | GAT | Gly67Asp  |
| 1448782 | C | T | -   | -   | -         |
| 1471515 | A | C | GAA | GAC | Glu101Asp |
| 1488469 | T | C | TAC | CAC | Tyr162His |
| 1503591 | T | G | -   | -   | -         |
| 1505774 | C | A | TGC | TGA | Cys182*   |
| 1510047 | G | A | -   | -   | -         |
| 1520015 | T | C | -   | -   | -         |
| 1522643 | A | T | AAC | TAC | Asn28Tyr  |
| 1524915 | C | T | CCA | CTA | Pro345Leu |

|         |   |   |     |     |           |
|---------|---|---|-----|-----|-----------|
| 1526887 | A | G | ACA | ACG | Thr       |
| 1548268 | A | G | TGA | TGG | *140Trp   |
| 1554449 | A | G | GAG | GGG | Glu56Gly  |
| 1557613 | G | A | CTG | CTA | Leu       |
| 1564004 | G | A | CTG | CTA | Leu       |
| 1564778 | G | A | GCA | ACA | Ala17Thr  |
| 1588391 | C | T | -   | -   | -         |
| 1595011 | A | G | ACG | GCG | Thr548Ala |
| 1601413 | C | T | GCG | GTG | Ala166Val |
| 1603790 | G | A | CTG | CTA | Leu       |
| 1615350 | G | A | CAG | CAA | Gln       |
| 1618891 | A | C | ATG | CTG | Met284Leu |
| 1628069 | T | C | TGT | TGC | Cys       |
| 1628960 | C | T | ACC | ACT | Thr       |
| 1629304 | C | T | GCG | GTG | Ala25Val  |
| 1649036 | T | C | TTT | CTT | Phe656Leu |
| 1656288 | C | T | CTG | TTG | Leu       |
| 1666219 | A | G | AAA | GAA | Lys370Glu |
| 1673231 | T | C | TAC | CAC | Tyr176His |
| 1685355 | A | C | ATC | CTC | Ile35Leu  |
| 1693292 | C | T | -   | -   | -         |
| 1699046 | C | T | TGC | TGT | Cys       |
| 1721603 | C | T | -   | -   | -         |
| 1755898 | C | T | AGC | AGT | Ser       |
| 1758607 | C | A | CCC | ACC | Pro48Thr  |
| 1772249 | C | T | CGC | CGT | Arg       |
| 1777278 | A | G | AGT | GGT | Ser130Gly |
| 1784272 | G | A | -   | -   | -         |
| 1784324 | G | A | GGC | AGC | Gly17Ser  |
| 1786966 | T | G | CGT | CGG | Arg       |
| 1810914 | G | A | GCT | ACT | Ala99Thr  |
| 1824170 | C | T | GCC | GCT | Ala       |
| 1832572 | C | T | ACC | ACT | Thr       |
| 1838206 | A | G | GTA | GTG | Val       |
| 1838566 | G | A | ACG | ACA | Thr       |
| 1840765 | C | T | CTG | TTG | Leu       |
| 1841558 | C | T | GCC | GCT | Ala       |
| 1858280 | A | G | GCA | GCG | Ala       |
| 1858850 | C | T | CTT | TTT | Leu11Phe  |
| 1867762 | A | G | ACG | GCG | Thr101Ala |
| 1868657 | C | T | GCC | GTC | Ala399Val |
| 1873870 | G | A | GGG | AGG | Gly69Arg  |
| 1875747 | G | A | AAG | AAA | Lys       |
| 1877172 | T | C | -   | -   | -         |
| 1943833 | C | T | CTC | TTC | Leu414Phe |
| 1978044 | T | G | CTC | CGC | Leu219Arg |



|         |   |   |     |     |           |
|---------|---|---|-----|-----|-----------|
| 2002943 | C | T | CTT | TTT | Leu63Phe  |
| 2013993 | A | G | CAA | CAG | Gln       |
| 2019207 | A | G | ATC | GTC | Ile23Val  |
| 2020244 | A | G | ACC | GCC | Thr34Ala  |
| 2024187 | G | A | GGC | AGC | Gly225Ser |
| 2036369 | G | A | GAT | AAT | Asp12Asn  |
| 2051128 | T | C | CTG | CCG | Leu469Pro |
| 2053289 | G | C | CGT | CCT | Arg223Pro |
| 2069797 | T | C | TTG | CTG | Leu       |
| 2073793 | T | C | CCT | CCC | Pro       |
| 2090176 | C | T | CCG | TCG | Pro231Ser |
| 2111111 | G | A | ACG | ACA | Thr       |
| 2129439 | A | G | AAA | AAG | Lys       |
| 2145434 | G | A | GTG | ATG | Val305Met |
| 2157050 | C | T | GTC | GTT | Val       |
| 2160804 | C | T | -   | -   | -         |
| 2169657 | C | T | CAT | TAT | His222Tyr |
| 2178761 | T | C | GGT | GGC | Gly       |
| 2190276 | C | T | -   | -   | -         |
| 2191673 | C | T | -   | -   | -         |
| 2202853 | C | T | CGT | TGT | Arg334Cys |
| 2207564 | A | G | -   | -   | -         |
| 2207806 | A | T | -   | -   | -         |
| 2212276 | G | A | CAG | CAA | Gln       |
| 2221187 | A | G | ATG | GTG | Met181Val |
| 2221582 | T | C | ATG | ACG | Met49Thr  |
| 2225193 | T | C | GTG | GCG | Val154Ala |
| 2233752 | A | G | AAG | GAG | Lys199Glu |
| 2238594 | T | C | TCG | CCG | Ser205Pro |
| 2239954 | C | T | CCG | CTG | Pro339Leu |
| 2269835 | A | G | GCA | GCG | Ala       |
| 2273669 | T | C | GTC | GCC | Val15Ala  |
| 2288504 | C | T | -   | -   | -         |
| 2291051 | A | G | CTA | CTG | Leu       |
| 2296505 | G | A | AGC | AAC | Ser400Asn |
| 2316433 | T | C | ATG | ACG | Met55Thr  |
| 2326896 | T | A | GTC | GAC | Val880Asp |
| 2332398 | G | A | GAT | AAT | Asp538Asn |
| 2333751 | G | A | GAC | AAC | Asp87Asn  |
| 2333762 | C | A | TCC | TAC | Ser83Tyr  |
| 2341469 | C | T | ACC | ACT | Thr       |
| 2341863 | A | G | ATC | GTC | Ile136Val |
| 2343508 | G | A | GGG | GAG | Gly185Glu |
| 2348633 | G | A | GGC | AGC | Gly260Ser |
| 2348902 | C | T | ACC | ACT | Thr       |
| 2353129 | A | G | ACA | GCA | Thr262Ala |

|         |   |   |     |     |            |
|---------|---|---|-----|-----|------------|
| 2355869 | C | T | CCG | CTG | Pro383Leu  |
| 2373091 | A | T | AAT | TAT | Asn44Tyr   |
| 2382070 | G | A | GCG | GCA | Ala        |
| 2388057 | C | T | ACT | ATT | Thr530Ile  |
| 2401233 | C | T | CGC | TGC | Arg116Cys  |
| 2413152 | C | G | CAC | GAC | His250Asp  |
| 2413211 | C | A | CGC | CGA | Arg        |
| 2438053 | A | G | GGA | GGG | Gly        |
| 2472090 | G | A | GGG | GGA | Gly        |
| 2482601 | G | A | GGA | GAA | Gly17Glu   |
| 2492505 | A | C | -   | -   | -          |
| 2492526 | T | C | -   | -   | -          |
| 2495154 | T | C | GCT | GCC | Ala        |
| 2497610 | G | T | AGG | ATG | Arg232Met  |
| 2501090 | A | G | ACC | GCC | Thr179Ala  |
| 2502356 | G | A | CCG | CCA | Pro        |
| 2506744 | C | A | CAC | AAC | His346Asn  |
| 2508939 | A | T | AAC | TAC | Asn101Tyr  |
| 2509943 | T | C | TTA | CTA | Leu        |
| 2524800 | G | A | GAG | GAA | Glu        |
| 2529964 | T | C | ATT | ATC | Ile        |
| 2538236 | C | T | CAC | CAT | His        |
| 2538933 | A | G | GAC | GGC | Asp42Gly   |
| 2543029 | C | T | GCG | GTG | Ala98Val   |
| 2546877 | G | A | GAC | AAC | Asp99Asn   |
| 2563769 | G | A | GGT | GAT | Gly190Asp  |
| 2582347 | C | G | CAG | GAG | Gln723Glu  |
| 2634864 | A | G | AAA | AAG | Lys        |
| 2647676 | C | A | -   | -   | -          |
| 2662406 | A | G | -   | -   | -          |
| 2669640 | G | A | GGG | GAG | Gly207Glu  |
| 2675634 | C | T | CGC | TGC | Arg199Cys  |
| 2680154 | T | G | TCT | GCT | Ser168Ala  |
| 2689095 | A | G | CAC | CGC | His186Arg  |
| 2737371 | T | C | ATC | ACC | Ile172Thr  |
| 2743543 | G | C | GTG | CTG | Val17Leu   |
| 2748900 | T | C | AAT | AAC | Asn        |
| 2750755 | G | A | GCG | ACG | Ala2421Thr |
| 2751236 | A | C | CAG | CCG | Gln2581Pro |
| 2760034 | G | T | TGT | TTT | Cys158Phe  |
| 2796634 | C | T | CGA | TGA | Arg244*    |
| 2797242 | T | C | CCT | CCC | Pro        |
| 2797490 | C | T | CGC | CGT | Arg        |
| 2806924 | G | A | CGC | CAC | Arg507His  |
| 2819619 | G | T | GGT | GTT | Gly21Val   |
| 2846417 | T | C | TGC | CGC | Cys120Arg  |

|         |   |   |     |     |            |
|---------|---|---|-----|-----|------------|
| 2875160 | C | T | CAA | TAA | Gln185*    |
| 2908219 | T | C | TAT | CAT | Tyr81His   |
| 2915648 | G | T | CGC | CTC | Arg141Leu  |
| 2915666 | A | C | GAC | GCC | Asp135Ala  |
| 2932803 | G | A | CGC | CAC | Arg23His   |
| 2948465 | A | G | -   | -   | -          |
| 2952080 | G | A | GCG | ACG | Ala797Thr  |
| 2963499 | G | T | GGC | GTC | Gly481Val  |
| 2972433 | C | T | -   | -   | -          |
| 2975982 | T | C | -   | -   | -          |
| 3004181 | A | G | GAA | GGA | Glu337Gly  |
| 3006737 | C | A | CGC | CGA | Arg        |
| 3031998 | C | T | ACC | ACT | Thr        |
| 3126273 | G | A | GCG | GCA | Ala        |
| 3127706 | G | T | -   | -   | -          |
| 3132774 | A | G | TTA | TTG | Leu        |
| 3134993 | T | A | ATT | ATA | Ile        |
| 3144053 | T | G | GTG | GGG | Val203Gly  |
| 3152879 | G | A | ATG | ATA | Met286Ile  |
| 3161974 | C | T | GGC | GGT | Gly        |
| 3179172 | G | A | CGC | CAC | Arg159His  |
| 3182059 | A | G | -   | -   | -          |
| 3185766 | G | A | GGA | GAA | Gly203Glu  |
| 3228109 | C | T | CGC | TGC | Arg261Cys  |
| 3234470 | G | A | GAG | GAA | Glu        |
| 3237694 | C | T | CAG | TAG | Gln12*     |
| 3239301 | A | G | CGA | CGG | Arg        |
| 3245844 | T | C | -   | -   | -          |
| 3250850 | G | A | -   | -   | -          |
| 3252042 | A | G | TTA | TTG | Leu        |
| 3253322 | A | G | CTA | CTG | Leu        |
| 3299998 | A | C | ATC | CTC | Ile167Leu  |
| 3354611 | T | C | CGT | CGC | Arg        |
| 3360344 | A | G | CAT | CGT | His97Arg   |
| 3372628 | C | T | ACG | ATG | Thr339Met  |
| 3380051 | G | A | GGA | GAA | Gly35Glu   |
| 3382573 | A | G | GAA | GGA | Glu38Gly   |
| 3382712 | G | A | GAG | GAA | Glu        |
| 3385249 | G | A | TGT | TAT | Cys106Tyr  |
| 3390057 | T | G | TGT | TGG | Cys1094Trp |
| 3398551 | C | T | GCT | GTT | Ala620Val  |
| 3426250 | A | G | ACA | ACG | Thr        |
| 3426843 | G | A | GTG | GTA | Val        |
| 3434756 | G | A | GGT | AGT | Gly384Ser  |
| 3441649 | T | C | TTT | TTC | Phe        |
| 3445498 | A | G | AGC | GGC | Ser201Gly  |

|         |   |   |     |     |           |
|---------|---|---|-----|-----|-----------|
| 3466292 | T | C | GTG | GCG | Val40Ala  |
| 3475293 | G | A | CCG | CCA | Pro       |
| 3476189 | C | T | ACC | ACT | Thr       |
| 3479997 | G | C | -   | -   | -         |
| 3483324 | A | G | CAA | CAG | Gln       |
| 3484294 | G | A | GTA | ATA | Val213Ile |
| 3508980 | G | A | TGC | TAC | Cys255Tyr |
| 3524058 | G | A | GGC | GAC | Gly166Asp |
| 3550968 | T | C | TAG | CAG | *138Gln   |
| 3559850 | A | G | AGC | GGC | Ser458Gly |
| 3563369 | C | T | CTG | TTG | Leu       |
| 3564730 | G | A | GTG | ATG | Val127Met |
| 3582556 | T | C | TTT | TCT | Phe917Ser |
| 3585890 | C | T | GTC | GTT | Val       |
| 3612820 | T | G | TGC | GGC | Cys349Gly |
| 3623826 | T | C | GTC | GCC | Val143Ala |
| 3659647 | G | A | GGG | GAG | Gly251Glu |
| 3689465 | A | G | CAA | CAG | Gln       |
| 3693688 | C | T | -   | -   | -         |
| 3759228 | A | T | ATA | ATT | Ile       |
| 3768874 | C | T | CGC | CGT | Arg       |
| 3824631 | T | G | GAT | GAG | Asp60Glu  |
| 3841111 | T | C | GTG | GCG | Val524Ala |
| 3841969 | G | A | GGG | AGG | Gly60Arg  |
| 3843665 | G | A | GGC | GAC | Gly204Asp |
| 3847076 | A | G | GTA | GTG | Val       |
| 3857080 | T | C | CTG | CCG | Leu199Pro |
| 3863384 | T | G | -   | -   | -         |
| 3879688 | C | T | GCC | GCT | Ala       |
| 3880961 | A | G | ATA | ATG | Ile240Met |
| 3908621 | A | G | GAC | GGC | Asp176Gly |
| 3918596 | C | T | CTC | TTC | Leu98Phe  |
| 3951813 | C | T | -   | -   | -         |
| 3953229 | C | T | CTG | TTG | Leu       |
| 3980159 | T | C | -   | -   | -         |
| 4002581 | T | C | TAT | CAT | Tyr27His  |
| 4020211 | C | T | ACG | ATG | Thr44Met  |
| 4025665 | C | T | CCG | CTG | Pro123Leu |
| 4050187 | C | T | TCA | TTA | Ser164Leu |
| 4077356 | A | G | GGA | GGG | Gly       |
| 4079882 | C | T | CTG | TTG | Leu       |
| 4081497 | G | A | GCG | GCA | Ala       |
| 4084601 | T | C | AGT | AGC | Ser       |
| 4105638 | A | G | ACT | GCT | Thr5Ala   |
| 4124891 | A | C | AAA | CAA | Lys474Gln |
| 4129460 | G | A | -   | -   | -         |

|         |   |   |     |     |            |
|---------|---|---|-----|-----|------------|
| 4165815 | G | A | TGC | TAC | Cys214Tyr  |
| 4179017 | T | C | GAT | GAC | Asp        |
| 4185249 | T | G | ACT | ACG | Thr        |
| 4192610 | C | T | AAC | AAT | Asn        |
| 4192687 | C | T | GCG | GTG | Ala32Val   |
| 4192891 | A | G | AAG | AGG | Lys100Arg  |
| 4196909 | C | T | GCC | GTC | Ala56Val   |
| 4197624 | G | A | CTG | CTA | Leu        |
| 4214165 | C | T | -   | -   | -          |
| 4215341 | A | G | CTA | CTG | Leu        |
| 4253640 | G | A | GCT | ACT | Ala315Thr  |
| 4265892 | C | T | CAC | TAC | His386Tyr  |
| 4273783 | C | A | CGT | AGT | Arg1019Ser |
| 4296944 | T | C | TAT | CAT | Tyr315His  |
| 4306542 | T | C | CAT | CAC | His        |
| 4319612 | C | T | ATC | ATT | Ile        |
| 4321191 | T | C | -   | -   | -          |
| 4321540 | A | G | AAG | AGG | Lys44Arg   |
| 4330627 | G | T | TCG | TCT | Ser        |
| 4380684 | A | G | GGA | GGG | Gly        |
| 4448855 | A | T | AAC | ATC | Asn282Ile  |
| 4454925 | G | A | GGT | AGT | Gly33Ser   |
| 4460147 | G | A | AGT | AAT | Ser252Asn  |
| 4470928 | C | T | TCG | TTG | Ser84Leu   |
| 4499497 | C | T | CAC | TAC | His54Tyr   |
| 4504639 | A | G | TAC | TGC | Tyr21Cys   |
| 4517865 | T | C | TGT | CGT | Cys137Arg  |
| 4519519 | G | A | AGC | AAC | Ser673Asn  |
| 4520947 | T | A | GTG | GAG | Val197Glu  |
| 4531906 | G | A | -   | -   | -          |
| 4581043 | T | G | GAT | GAG | Asp40Glu   |
| 4581633 | A | T | ATA | ATT | Ile        |
| 4584882 | A | G | GAA | GAG | Glu        |
| 4620427 | A | G | AGA | GGA | Arg96Gly   |
| 4621521 | G | A | -   | -   | -          |
| 4638263 | C | T | GAC | GAT | Asp        |
| 4653151 | T | G | TCC | GCC | Ser383Ala  |
| 4653522 | A | T | GAC | GTC | Asp259Val  |
| 4653622 | T | G | TGC | GGC | Cys226Gly  |
| 4665891 | C | T | GCG | GTG | Ala245Val  |
| 4666765 | C | T | -   | -   | -          |
| 4701741 | G | T | GTA | TTA | Val77Leu   |
| 4732669 | C | T | -   | -   | -          |
| 4742018 | C | A | ACC | AAC | Thr457Asn  |
| 4759129 | C | T | AGC | AGT | Ser        |
| 4761354 | C | T | CTG | TTG | Leu        |

|         |   |   |     |     |           |
|---------|---|---|-----|-----|-----------|
| 4775254 | C | A | CCG | CAG | Pro237Gln |
| 4791187 | T | C | GTG | GCG | Val120Ala |
| 4804749 | T | C | CTG | CCG | Leu86Pro  |
| 4805736 | T | C | TTA | CTA | Leu       |

Synonymous SNPs = 141

Non-synonymous SNPs = 222

\* = SNPs in stop codon

"-" = SNPs in intergenic region

dN/dS = 0.940

## Supplementary Table 1C

### Biallelic polymorphisms positions (BiP) assigning haplotypes.

| Marker | Gene     |
|--------|----------|
| BiP1   | STY0006* |
| BiP2   | STY0006* |
| BiP89  | STY0135  |
| BiP3   | STY0135* |
| BiP4   | STY0175* |
| BiP5   | STY0214* |
| BiP90  | STY0321  |
| BiP6   | STY0321* |
| BiP7   | STY0336* |
| BiP68  | STY0539  |
| BiP69  | STY0539  |
| BiP8   | STY0573* |
| BiP91  | STY0831  |
| BiP9   | STY0831* |
| BiP10  | STY0961* |
| BiP84a | STY0961* |
| BiP84b | STY0961* |
| BiP84c | STY0961* |
| BiP11  | STY0962* |
| BiP85a | STY0962* |
| BiP85b | STY0962* |
| BiP85c | STY0962* |
| BiP85d | STY0962* |
| BiP85e | STY0962* |
| BiP92  | STY0981  |
| BiP86a | STY0981* |
| BiP86b | STY0981* |
| BiP87a | STY0984* |
| BiP87b | STY0984* |
| BiP12  | STY1097* |
| BiP13  | STY1121* |
| BiP80  | STY1286  |
| BiP14  | STY1286* |
| BiP15  | STY1327* |
| BiP70  | STY1440  |
| BiP88a | STY1503* |
| BiP88b | STY1503* |
| BiP88c | STY1503* |
| BiP88d | STY1503* |
| BiP88e | STY1503* |
| BiP88f | STY1503* |
| BiP16  | STY1556* |
| BiP17  | STY1693* |



|         |          |
|---------|----------|
| BiP18   | STY1720* |
| BiP19   | STY1808* |
| BiP81   | STY1914  |
| BiP82   | STY1914  |
| BiP93   | STY1919  |
| BiP20   | STY1919* |
| BiP21   | STY1919* |
| BiP22   | STY1947* |
| BiP23   | STY1948* |
| BiP71   | STY1995  |
| BiP24   | STY2093* |
| BiP25   | STY2211* |
| BiP26   | STY2211* |
| BiP27   | STY2281* |
| BiP28   | STY2281* |
| BiP72   | STY2311  |
| BiP73   | STY2311  |
| BiP94   | STY2389  |
| BiP95   | STY2389  |
| BiP96   | STY2389  |
| BiP97   | STY2389  |
| BiP98   | STY2389  |
| BiP99   | STY2389  |
| BiP100  | STY2389  |
| BiP101  | STY2389  |
| BiP105  | STY2389  |
| BiP106  | STY2389  |
| BiP29   | STY2389* |
| BiP30   | STY2389* |
| BiP31   | STY2389* |
| BiP74   | STY2418  |
| BiP102  | STY2441  |
| BiP112a | STY2441  |
| BiP112b | STY2441  |
| BiP32   | STY2441* |
| BiP33   | STY2513* |
| BiP107  | STY2575  |
| BiP34   | STY2575* |
| BiP35   | STY2621* |
| BiP103  | STY2629  |
| BiP36   | STY2629* |
| BiP37   | STY2629* |
| BiP38   | STY2629* |
| BiP39   | STY2629* |
| BiP40   | STY2711* |
| BiP41   | STY2785* |

|        |          |
|--------|----------|
| BiP42  | STY2834* |
| BiP67  | STY2877* |
| BiP43  | STY2948* |
| BiP44  | STY2971* |
| BiP45  | STY3033* |
| BiP108 | STY3082  |
| BiP46  | STY3082* |
| BiP47  | STY3082* |
| BiP48  | STY3196* |
| BiP75  | STY3338  |
| BiP76  | STY3397  |
| BiP49  | STY3444* |
| BiP50  | STY3499* |
| BiP51  | STY3499* |
| BiP52  | STY3499* |
| BiP53  | STY3507* |
| BiP77  | STY3570  |
| BiP78  | STY3570  |
| BiP54  | STY3614* |
| BiP55  | STY3614* |
| BiP56  | STY3622* |
| BiP57  | STY3876* |
| BiP58  | STY3876* |
| BiP59  | STY3940* |
| BiP109 | STY4339  |
| BiP60  | STY4417* |
| BiP104 | STY4499  |
| BiP61  | STY4499* |
| BiP79  | STY4537  |
| BiP62  | STY4545* |
| BiP63  | STY4562* |
| BiP64  | STY4562* |
| BiP65  | STY4793* |
| BiP66  | STY4851* |

| <b>Ancestral Nucleotide</b> | <b>Derived Nucleotide</b> | <b>CT18 position</b> |
|-----------------------------|---------------------------|----------------------|
| C                           | T                         | 6317                 |
| C                           | T                         | 6261                 |
| C                           | A                         | 138729               |
| C                           | T                         | 138680               |
| C                           | T                         | 180029               |
| G                           | T                         | 224642               |
| G                           | A                         | 332683               |
| G                           | A                         | 332645               |
| C                           | T                         | 343912               |
| T                           | C                         | 546949               |
| G                           | A                         | 547274               |
| T                           | C                         | 580916               |
| C                           | T                         | 830308               |
| C                           | T                         | 830630               |
| G                           | A                         | 955273               |
| C                           | T                         | 954935               |
| T                           | C                         | 954997               |
| C                           | T                         | 955144               |
| G                           | A                         | 958002               |
| C                           | T                         | 957702               |
| T                           | C                         | 957875               |
| G                           | A                         | 957954               |
| T                           | C                         | 958056               |
| T                           | A                         | 958089               |
| G                           | A                         | 976842               |
| C                           | T                         | 976730               |
| C                           | T                         | 977027               |
| A                           | G                         | 979505               |
| G                           | A                         | 979526               |
| C                           | T                         | 1076027              |
| T                           | C                         | 1089517              |
| G                           | A                         | 1240750              |
| G                           | A                         | 1240637              |
| C                           | T                         | 1285129              |
| C                           | T                         | 1391782              |
| C                           | T                         | 1459270              |
| A                           | G                         | 1459275              |
| A                           | G                         | 1459277              |
| C                           | T                         | 1459363              |
| A                           | G                         | 1459445              |
| A                           | G                         | 1459472              |
| C                           | T                         | 1509712              |
| C                           | T                         | 1619556              |

|   |   |         |
|---|---|---------|
| T | C | 1641434 |
| C | T | 1726442 |
| G | A | 1808734 |
| G | A | 1809013 |
| G | A | 1813023 |
| A | G | 1812993 |
| G | A | 1812968 |
| G | A | 1836117 |
| C | T | 1838206 |
| G | A | 1878360 |
| C | T | 1943523 |
| G | A | 2048732 |
| T | G | 2048739 |
| C | T | 2108140 |
| G | A | 2108322 |
| G | A | 2141684 |
| G | A | 2141535 |
| C | T | 2221033 |
| A | G | 2221015 |
| C | A | 2220992 |
| C | A | 2220857 |
| G | T | 2220836 |
| A | G | 2221084 |
| C | T | 2221025 |
| C | T | 2221022 |
| G | A | 2221061 |
| G | A | 2221217 |
| C | T | 2221079 |
| G | A | 2220955 |
| A | G | 2221024 |
| C | T | 2249287 |
| G | A | 2271858 |
| C | T | 2272180 |
| C | T | 2272181 |
| C | G | 2271853 |
| C | T | 2348902 |
| T | C | 2412815 |
| A | G | 2413077 |
| C | T | 2456099 |
| G | A | 2463900 |
| A | G | 2464185 |
| C | A | 2463810 |
| G | A | 2463831 |
| G | A | 2464093 |
| G | A | 2544044 |
| G | A | 2643935 |

|   |   |         |
|---|---|---------|
| G | A | 2697121 |
| T | G | 2757499 |
| G | A | 2825733 |
| G | A | 2847564 |
| G | A | 2902990 |
| G | A | 2947124 |
| G | T | 2946833 |
| G | A | 2947118 |
| C | T | 3062270 |
| G | A | 3181174 |
| G | A | 3245128 |
| C | T | 3287913 |
| C | T | 3339407 |
| C | T | 3339598 |
| G | A | 3339665 |
| G | A | 3346870 |
| C | T | 3415355 |
| T | C | 3415394 |
| T | C | 3469152 |
| C | T | 3469195 |
| C | T | 3476189 |
| G | A | 3731468 |
| C | T | 3731453 |
| G | A | 3806041 |
| C | T | 4218089 |
| C | T | 4286222 |
| C | T | 4391261 |
| C | T | 4391077 |
| C | T | 4422904 |
| G | A | 4429843 |
| G | A | 4443365 |
| A | T | 4443328 |
| T | G | 4651341 |
| A | G | 4714977 |

---

**Supplementary Table 1D**

---

**Genomic deletions detected in this study.**

---

**ID**

---

D1

D2

D3

D4

D5

D6

D7

D8

D9

D10

D11

D12

D13

D14

D15

D16

D17

D18

D19

D20

D21

D22

D23

D24

D25

D26

D27

D28

D29

D30

D31

D32

D33

D34

D35



| <b>Gene id</b>                                       | <b>CT18 positions</b> | <b>Size (bp)</b> |
|------------------------------------------------------|-----------------------|------------------|
| STY0096                                              | 95086 - 95881         | 194              |
| STY0308                                              | 320531 - 324393       | 3861             |
| STY0525                                              | 531966 - 532482       | 515              |
| STY0765                                              | 764172 - 765946       | 1773             |
| STY0833                                              | 831540 - 833805       | 2264             |
| STY0947                                              | 937728 - 937935       | 206              |
| STY1648                                              | 1575901 - 1576261     | 359              |
| STY1748                                              | 1667459 - 1668460     | 1000             |
| STY2091                                              | 1942582 - 1943224     | 641              |
| STY2157, STY2158                                     | 2003593 - 2004607     | 1014             |
| STY2163                                              | 2008364 - 2008916     | 551              |
| STY2166                                              | 2009890 - 2011095     | 1204             |
| STY2169, STY2170                                     | 2014368 - 2015144     | 776              |
| STY2181, STY2182, STY2183, STY2184, STY2185, STY2186 | 2024907 - 2028945     | 4038             |
| STY2192, STY2193                                     | 2032030 - 2033383     | 1353             |

|                                    |                   |      |
|------------------------------------|-------------------|------|
| STY2194                            | 2033361 - 2035065 | 1703 |
| STY2195, STY2196                   | 2035229 - 2036403 | 1174 |
| STY2199, STY2200, STY2201, STY2202 | 2037487 - 2040529 | 3042 |
| STY2210                            | 2047166 - 2047340 | 173  |
| STY2226                            | 2059701 - 2060438 | 736  |
| STY2418                            | 2248211 - 2249446 | 1234 |
| STY2668                            | 2505709 - 2507438 | 1728 |
| STY2758                            | 2599532 - 2605213 | 5680 |
| STY2775                            | 2627135 - 2629513 | 2377 |
| STY3169                            | 3041128 - 3041989 | 860  |
| STY3325                            | 3170215 - 3171859 | 1643 |
| STY3426                            | 3267539 - 3268870 | 1330 |
| STY3570                            | 3413541 - 3416656 | 3114 |
| STY3621                            | 3474982 - 3475924 | 941  |
| STY3828                            | 3689433 - 3690260 | 826  |
| STY4166                            | 4025298 - 4026623 | 1324 |
| STY4184                            | 4046091 - 4049524 | 3432 |
| STY4318                            | 4194856 - 4200465 | 5608 |

STY4716

4578042 - 4579899 1856

STY4782

4641054 - 4641831 776

---

**Number of genes**

---

1

1

1

1

1

1

1

1

1

2

1

1

2

6

2

1

2

4

1

1

1

1

1

1

1

1

1

1

1

1

1

1

1

1

1

---

**Strain(s) harbouring the deletion**

---

1, 5, 6, 7, 9, 12 (11-05-2010), 12 (01-10-2012), 13, 14, 15, 31, 34, 35, 36, 42, 46, 49, 53, 54, 70, 71, 225, 269, 279, 361, 674, 739, 748, 911, 1012, 1341

6, 8, 31, 34, 35, 42, 46, 53, 54, 70, 71, 225, 269, 279, 674, 739, 748, 911, 1341

1, 5, 6, 7, 8, 9, 12 (11-05-2010), 12 (01-10-2012), 13, 14, 15, 31, 34, 35, 36, 42, 46, 49, 53, 54, 70, 71, 225, 269, 361, 674, 739, 748, 911, 1012, 1341

1, 6, 7, 8, 9, 12 (11-05-2010), 12 (01-10-2012), 13, 14, 15, 31, 34, 35, 36, 42, 46, 49, 53, 54, 70, 71, 225, 269, 279, 361, 674, 739, 748, 911, 1012, 1341

1, 6, 7, 8, 9, 12 (11-05-2010), 12 (01-10-2012), 13, 15, 31, 34, 35, 36, 42, 46, 49, 53, 54, 70, 71, 225, 269, 279, 361, 674, 739, 748, 911, 1012, 1341

1, 6, 8, 12 (01-10-2012), 31, 34, 35, 36, 42, 46, 49, 53, 54, 70, 71, 674, 748, 911, 1012

1, 5, 6, 7, 9, 12 (11-05-2010), 12 (01-10-2012), 13, 14, 15, 31, 34, 35, 36, 42, 46, 49, 53, 54, 70, 71, 225, 269, 279, 361, 674, 739, 748, 1012, 1341

1, 5, 6, 7, 8, 9, 12 (11-05-2010), 12 (01-10-2012), 13, 14, 15, 31, 34, 35, 42, 46, 49, 53, 70, 71, 225, 269, 279, 361, 674, 739, 748, 911, 1012, 1341

1, 5, 6, 7, 8, 9, 12 (11-05-2010), 12 (01-10-2012), 13, 14, 15, 31, 34, 35, 36, 42, 46, 49, 53, 54, 70, 71, 225, 269, 361, 674, 739, 748, 911, 1012, 1341

1, 5, 6, 7, 9, 12 (11-05-2010), 12 (01-10-2012), 13, 14, 15, 31, 34, 35, 36, 42, 46, 49, 53, 54, 70, 71, 225, 269, 279, 361, 674, 739, 748, 911, 1012, 1341

1, 5, 6, 7, 9, 12 (11-05-2010), 12 (01-10-2012), 13, 14, 15, 31, 34, 35, 36, 42, 46, 49, 53, 54, 70, 71, 225, 269, 279, 361, 674, 739, 748, 911, 1012, 1341

1, 5, 6, 7, 9, 12 (11-05-2010), 12 (01-10-2012), 13, 14, 15, 31, 34, 35, 36, 42, 46, 49, 53, 54, 70, 71, 225, 269, 279, 361, 674, 739, 748, 911, 1012, 1341

1, 5, 6, 7, 9, 12 (11-05-2010), 12 (01-10-2012), 13, 14, 15, 31, 34, 35, 36, 42, 46, 49, 53, 54, 70, 71, 225, 269, 279, 361, 674, 739, 748, 911, 1012, 1341

1, 5, 6, 7, 9, 12 (11-05-2010), 12 (01-10-2012), 13, 14, 15, 31, 34, 35, 36, 42, 46, 49, 54, 70, 71, 225, 269, 279, 361, 674, 748, 1341

1, 5, 6, 7, 9, 12 (11-05-2010), 12 (01-10-2012), 13, 14, 15, 31, 34, 35, 36, 42, 46, 49, 53, 54, 70, 71, 225, 269, 279, 361, 674, 748, 1012, 1341

1, 5, 6, 7, 9, 12 (11-05-2010), 12 (01-10-2012), 13, 14, 15, 31, 34, 35, 36, 42, 46, 49, 53, 54, 70, 71, 225, 269, 279, 361, 674, 739, 748, 911, 1012, 1341

1, 5, 6, 7, 9, 12 (11-05-2010), 12 (01-10-2012), 13, 14, 15, 31, 34, 35, 36, 42, 46, 49, 53, 54, 70, 71, 225, 269, 279, 361, 674, 739, 748, 911, 1012, 1341

1, 5, 6, 7, 9, 12 (11-05-2010), 12 (01-10-2012), 13, 14, 15, 31, 34, 35, 36, 42, 46, 49, 53, 54, 70, 71, 225, 269, 279, 361, 674, 739, 748, 1012

1, 5, 6, 7, 9, 12 (11-05-2010), 12 (01-10-2012), 13, 14, 15, 31, 34, 35, 36, 42, 46, 49, 53, 54, 70, 71, 225, 269, 279, 361, 674, 739, 748, 911, 1012, 1341

1, 5, 6, 7, 8, 9, 12 (11-05-2010), 12 (01-10-2012), 13, 14, 15, 31, 34, 35, 36, 42, 46, 49, 53, 54, 70, 71, 225, 269, 361, 674, 748, 1012, 1341

1, 5, 6, 7, 8, 9, 12 (11-05-2010), 12 (01-10-2012), 13, 14, 15, 31, 34, 35, 36, 42, 46, 49, 53, 54, 70, 71, 225, 279, 361, 674, 739, 748, 911, 1012, 1341

1, 6, 7, 8, 9, 12 (11-05-2010), 13, 14, 15, 31, 34, 35, 36, 42, 46, 49, 53, 54, 70, 71, 225, 279, 361, 674, 739, 748, 1012, 1341

1, 5, 6, 7, 9, 12 (11-05-2010), 13, 14, 15, 31, 34, 35, 42, 46, 49, 53, 70, 71

1, 5, 6, 7, 8, 9, 12 (11-05-2010), 12 (01-10-2012), 13, 14, 15, 31, 34, 35, 36, 42, 46, 49, 53, 54, 70, 71, 225, 361, 674, 739, 748, 1012

1, 7, 9, 12 (11-05-2010), 13, 14, 15, 31, 42, 46

1, 5, 6, 7, 9, 12 (11-05-2010), 12 (01-10-2012), 13, 14, 15, 31, 34, 35, 36, 42, 46, 49, 53, 54, 70, 71, 225, 269, 279, 361, 674, 739, 748, 911, 1012, 1341

1, 5, 6, 7, 8, 9, 12 (11-05-2010), 12 (01-10-2012), 13, 14, 15, 31, 34, 35, 36, 42, 46, 53, 54, 70, 71, 225, 269, 279, 361, 674, 739, 748, 911, 1012, 1341

5, 6, 8, 12 (01-10-2012), 31, 34, 35, 36, 42, 46, 49, 53, 54, 70, 71, 225, 269, 279, 361, 674, 739, 748, 911, 1012, 1341

5, 6, 8, 12 (01-10-2012), 31, 34, 35, 36, 42, 46, 49, 53, 54, 70, 71, 225, 269, 279, 361, 674, 739, 748, 911, 1012, 1341

5, 6, 8, 12 (01-10-2012), 31, 34, 35, 36, 42, 46, 49, 53, 54, 70, 71, 225, 269, 279, 361, 674, 739, 748, 911, 1012, 1341

1, 5, 6, 7, 8, 9, 12 (11-05-2010), 12 (01-10-2012), 13, 14, 15, 31, 34, 35, 36, 42, 46, 49, 53, 54, 70, 71, 225, 269, 361, 674, 739, 748, 911

1, 6, 7, 8, 9, 12 (11-05-2010), 13, 14, 15, 31, 34, 35, 36, 42, 46, 49, 53, 54, 70, 71, 225, 269, 279, 361, 674, 739, 748, 1012, 1341

1, 5, 6, 7, 8, 9, 12 (11-05-2010), 12 (01-10-2012), 13, 14, 15, 31, 34, 35, 36, 42, 46, 49, 53, 54, 70, 71, 225, 674, 739, 748, 1012, 1341



1, 5, 7, 9, 12 (11-05-2010), 13, 14, 15, 31, 34, 35, 42, 46, 49, 53, 54, 70, 71, 269, 1012

1, 5, 6, 7, 9, 12 (11-05-2010), 12 (01-10-2012), 13, 14, 15, 31, 34, 35, 36, 42, 46, 49, 53, 54, 70, 71, 269, 279, 674

**Supplementary Table 1E****Annotated genes of the translocated region illustrated in figure 3**

| <b>Gene</b>    | <b>PfamA profile</b>            |
|----------------|---------------------------------|
| DUF484         | PF04340                         |
| yifL           | PF01678                         |
| dapF           | PF13627                         |
| DUF3021        | PF11457                         |
| cyaY           | PF01491                         |
| insA           | PF03811_PF12759                 |
| IS1            | PF03400                         |
| merR           | PF00376_PF09278                 |
| merT           | PF02411                         |
| merP           | PF00403                         |
| merC           | PF03203                         |
| merA           | PF00070_PF00403_PF02852_PF07992 |
| merD           | PF13411                         |
| merE           | PF05052                         |
| tnpM           | PF00563                         |
| IS3            | PF00665_PF13518                 |
| $\Delta$ repA  |                                 |
| repC           | PF06504                         |
| sul2           | PF00809                         |
| strA           | PF01636                         |
| strB           | PF04655                         |
| tnpB           | PF14319                         |
| blaTEM-1       | PF13354                         |
| tnpR           | PF00239_PF02796                 |
| sul1           | PF00809                         |
| qacE           | PF00893                         |
| drfA7          | PF00186                         |
| $\Delta$ aadA1 |                                 |
| int            | PF00589_PF13495                 |
| tnpM           | PF00563_PF11809                 |
| tnpR           | PF00239_PF02796                 |
| tnpA           | PF01526_PF13700                 |
| GNAT           | PF00583                         |
| catA1          | PF00302                         |
| insA           | PF03811_PF12759                 |
| IS1            | PF03400                         |
| cyaA           | PF01295_PF12633                 |
| hemC           | PF01379_PF03900                 |
| hemD           | PF02602                         |
| hemX           | PF04375                         |
| hemY           | PF07219_PF07719                 |

**Function**

Protein of unknown function DUF484  
Diaminopimelate epimerase  
Prokaryotic lipoprotein-attachment site  
Protein of unknown function DUF3021  
Frataxin-like domain  
InsA N-terminal domain  
IS1 transposase  
MerR family regulatory protein  
MerT mercuric transport protein  
Heavy-metal-associated domain  
MerC mercury resistance protein  
Pyridine nucleotide-disulphide oxidoreductase  
Mercuric resistance transcriptional repressor protein MerD  
MerE protein  
Transposition modulator TnpM  
Integrase core domain  
Replication protein A (RepA)  
Replication protein C (RepC)  
Pterin binding enzyme  
Phosphotransferase enzyme family  
Aminoglycoside/hydroxyurea antibiotic resistance kinase  
Transposase zinc-binding domain  
Beta-lactamase enzyme family  
Resolvase  
Pterin binding enzyme  
Small Multidrug Resistance protein  
Dihydrofolate reductase  
aadA1 streptomycin and spectinomycin resistance  
Phage integrase family  
Transposition modulator TnpM  
Resolvase  
Tn3 transposase  
Acetyltransferase (GNAT) family  
Chloramphenicol acetyltransferase  
InsA N-terminal domain  
IS1 transposase  
Adenylate cyclase class-I  
Porphobilinogen deaminase  
Uroporphyrinogen-III synthase HemD  
HemX protein  
HemY protein

**Supplementary Table 1F**  
**SOAPdenovo assembly details**

| <b>Strain</b>                             | <b>Number of scaffolds</b> | <b>Estimated genome size N50</b> |        |
|-------------------------------------------|----------------------------|----------------------------------|--------|
| Salmonella enterica serovar Typhi str. 31 | 106                        | 4753057                          | 607315 |
| Salmonella enterica serovar Typhi str. 34 | 84                         | 4776348                          | 712521 |
| Salmonella enterica serovar Typhi str. 54 | 471                        | 4800417                          | 72347  |
| Salmonella enterica serovar Typhi str. 71 | 86                         | 4763979                          | 711616 |

**scaffold no containing the region**

10

6

11

9
